# Supplementary material
Source: PubMed Central journal article supplement (PMC2920741)
Supplement: mmc2.pdf [file mmc2.pdf]

Biophysical Journal, Volume 99

Supporting Material

Asymmetry as the key to clathrin cage assembly

Wouter K den Otter, Marten Renes, and Wim Briels

Supplementary material to  
**Asymmetry as the key to clathrin cage assembly**

Wouter K. den Otter, Marten R. Renes and W.J. Briels

**Supplementary movie.** The spontaneous self-assembly of two clathrin cages at  $\epsilon = 8k_B T$  over the course of  $\sim 7 \cdot 10^6$  Monte Carlo moves per particle. The movie shows only a small segment of the simulation box, which contains  $10^4$  particles at a concentration of  $10^{-3}\sigma^{-3}$ . The colour coding of the leg-segments is the same as in Figure 1 of the main text.
